# Supplementary material
Source: publisher figshare collection journal article supplement (https://tandf.figshare.com/ndownloader/files/17504888)
Supplement: Supplementary file 1 [file 17504888]

| Table S1. Synthetic Oligonucleotides | |
| --- | --- |
| Oligonucleotide Name | Sequence |
| ProAtMLLR2-F | AAAAAGCAGGCTCCGACACTGCTAATGCTTTAAATGATGAAGG |
| ProAtMLLR2-R | AGAAAGCTGGGTAGACACTCATTGATTGATTTTTCTAGAAAGAA |
| ProAtMLLR3-F | AAAAAGCAGGCTCCGACACTACGAGCCAAGCGCAATGCT |
| ProAtMLLR3-R | AGAAAGCTGGGTAGACACTCATGGCGGCGGAGACGAC |
